# Supplementary material
Source: Springer Nature journal article supplement (https://www.springermedizin.de/resource/supplementary/13054_2010_8787_MOESM2_ESM.PDF/9732574)
Supplement: MOESM2 [file 9732574]

## Substitutions that allow predictions for patients without available PCR data

| Substitution for parameter : | in equation [ ] | Substitution <sup>a</sup>                                                                          | Source of correlation | Comment                                                                                                                                                                                                                                                                       |
|------------------------------|-----------------|----------------------------------------------------------------------------------------------------|-----------------------|-------------------------------------------------------------------------------------------------------------------------------------------------------------------------------------------------------------------------------------------------------------------------------|
| $Sh_{PCR+}$                  | 3, 4, 5         | $= Sh_{BC+} * 1.658^b$                                                                             | Tab. 1                | $Sh_{PCR+} = 73/221=0,330$ ;<br>$Sh_{BC+} = 44/221=0,199$                                                                                                                                                                                                                     |
| $In_{PCR+}^{IA}$             | 3, 4, 5         | $= In_{total}^{mod ific} * 1.185$                                                                  | Fig. 1                | $In_{total}^{mod ific} = 74/221=0.335$ (total adjustments)<br>$In_{PCR+}^{IA} = 29/73=0.397$ (adjusted PCR+)                                                                                                                                                                  |
| $M_{PCR+}^{IA}$              | 5               | $= \frac{0,831 * M_{total}}{In_{total}^{mod ific} + \frac{1 - In_{total}^{mod ific}}{RR\uparrow}}$ | [3, 4]<br>Fig. 1      | $RR\uparrow = 2.315$ (relative risk of non-survival)<br>$M_{total} = 59/189=0.312$ (all patients);<br>$M_{PCR+}^{IA} = (9+3)/(19+10)=0.414$ ;<br>$In_{total}^{mod ific} = 74/221= 0.335$                                                                                      |
| $In_{PCR+}^{IA}$             | 3, 4, 5         | $= In_{PCR+}^{mod ific} * 0.829$                                                                   | [17]                  | PCR+ had capacity to trigger 29 early ad-equate treatments along with 6 over-treat-ments => In interventional use, 35 PCR+ triggered modifications of treatment would lead to the described effects, to which really $0.829*35= 29$ inadequately treated episodes contribute. |

<sup>a</sup> Definitions of substitution variables:

$Sh_{BC+}$ : Share of episodes for which at least one clinically significant microorganism was detected by blood culture.

$In_{total}^{mod ific}$ : Incidence of modification of initial antimicrobial treatment in the total patient cohort (between 12 hours and 7.5 days of initiation of first treatment or blood culture order), for coverage of different kinds of microorganisms or of different resistances.

$Mortality_{total}$ : Mean mortality rate in the total patient cohort, within 30 days of discontinuing antimicrobial treatment

$In_{PCR+}^{mod ific}$ : Incidence of modification of initial antimicrobial treatment based on PCR+ results in interventional use, consisting of switches to earlier adequate treatment, and to over-treatment. The latter may not be easy to discern, even in retrospective analysis, once PCR+ results are utilized interventionally.

<sup>b</sup> The factor we use to estimate PCR+ share based on BC+ share describes the sensitivity advantage we saw in our ICU and post-surgical sepsis episodes when adding just *one* PCR test. Table 2 and, on a broader scale, reference [17] show possible variance with patient mix.
